# Supplementary figures and images for: Streamlining and Core Genome Conservation among Highly Divergent Members of the SAR11 Clade
Source: PubMed Central journal article supplement — mBio. 2012 Sep 18;3(5):e00252-12. doi: 10.1128/mBio.00252-12 (PMC3448164; doi:10.1128/mbio.00252-12), 2012-09-18

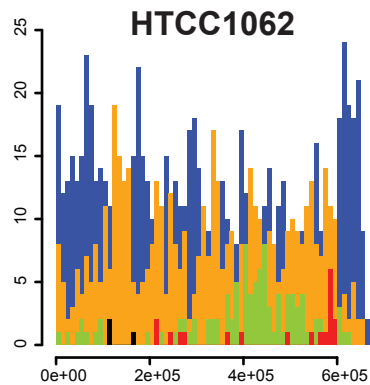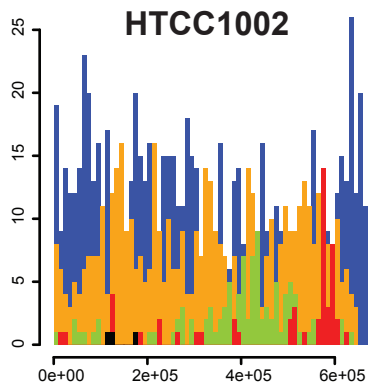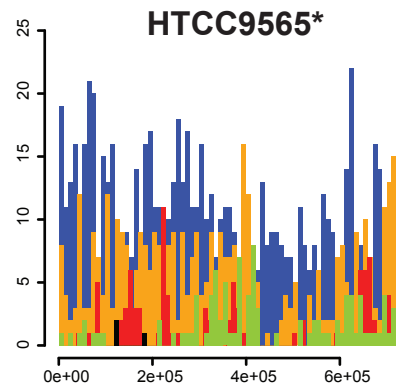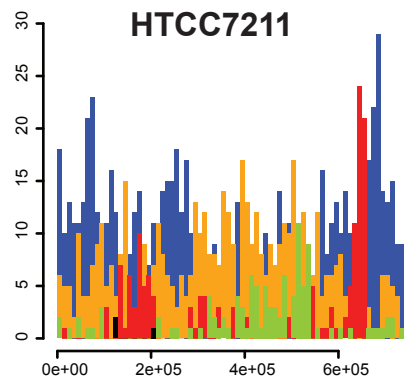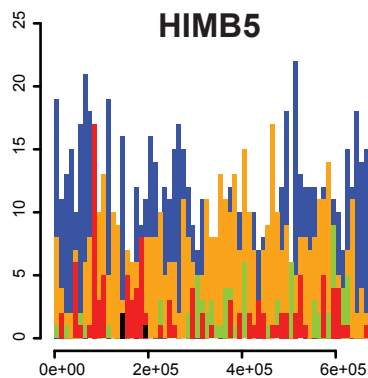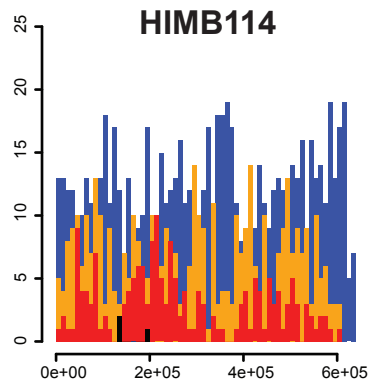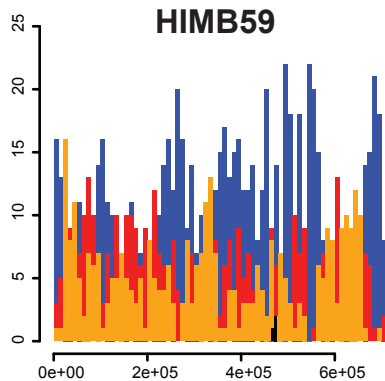

Supplement: mbo005121328sf01.pdf [file mbo005121328sf01.pdf]

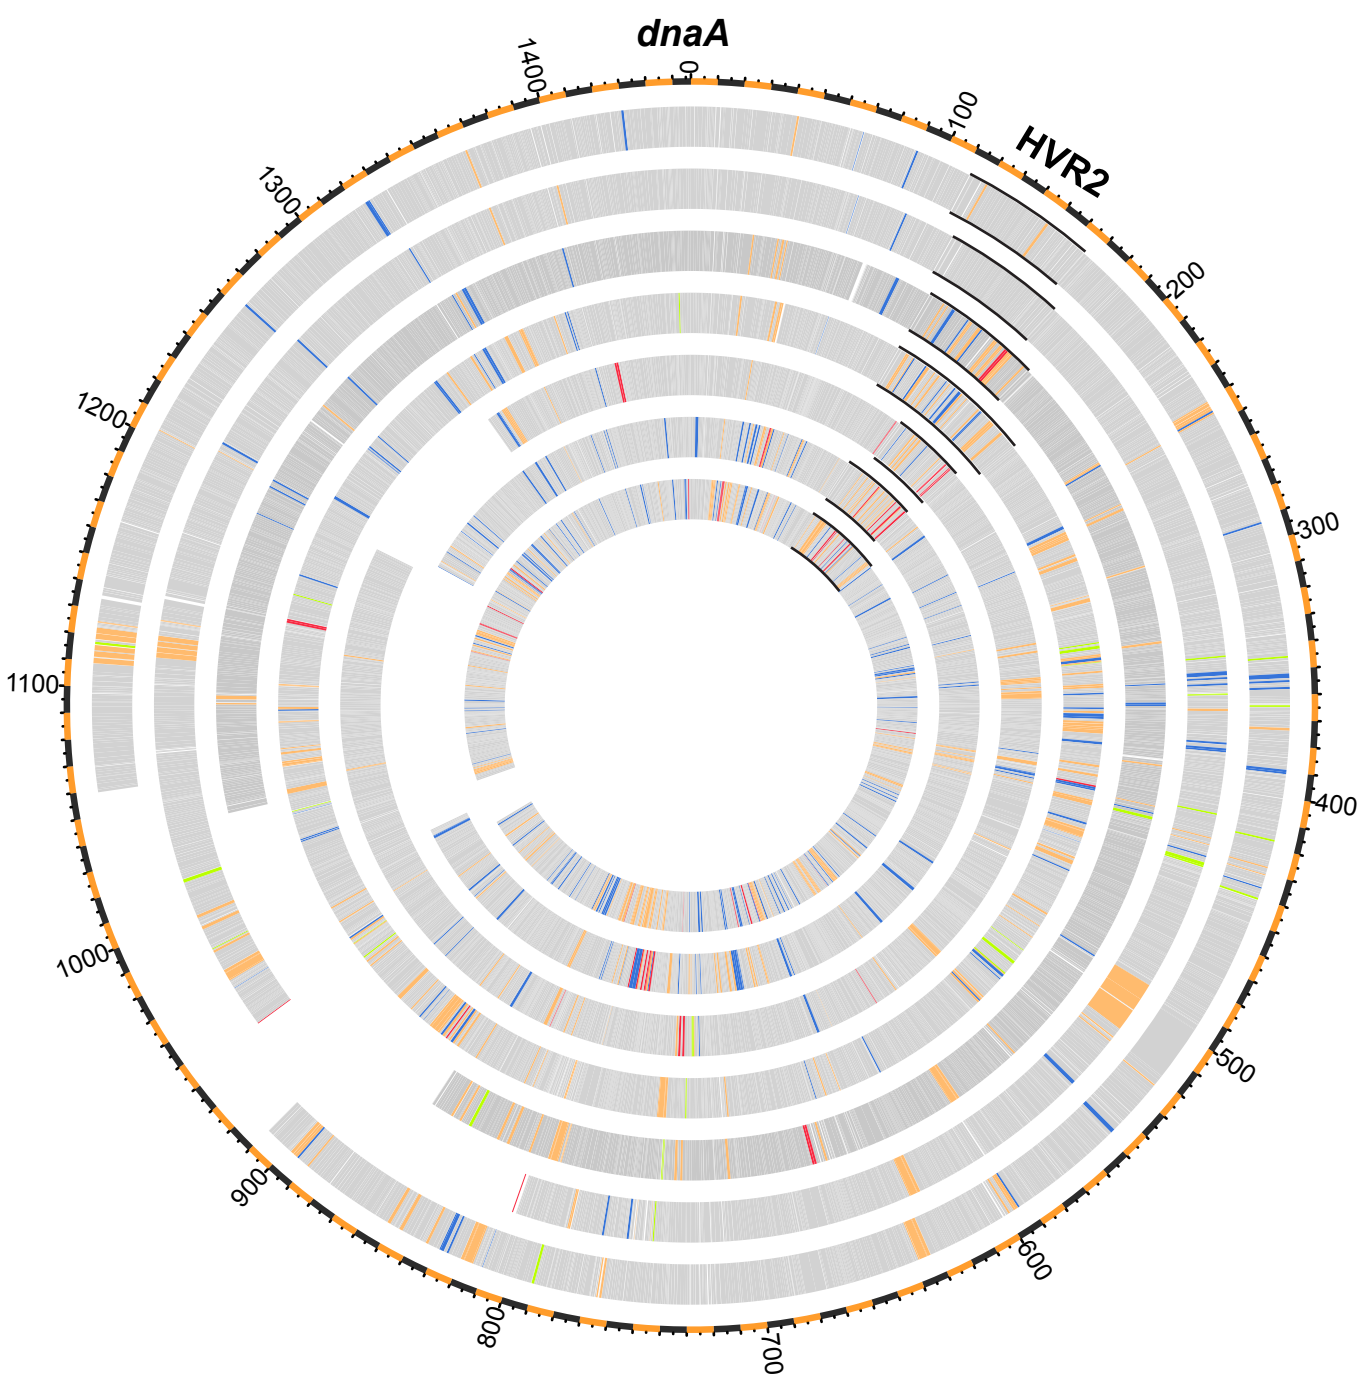

Supplement: mbo005121328sf02.pdf [file mbo005121328sf02.pdf]

number of paralogs

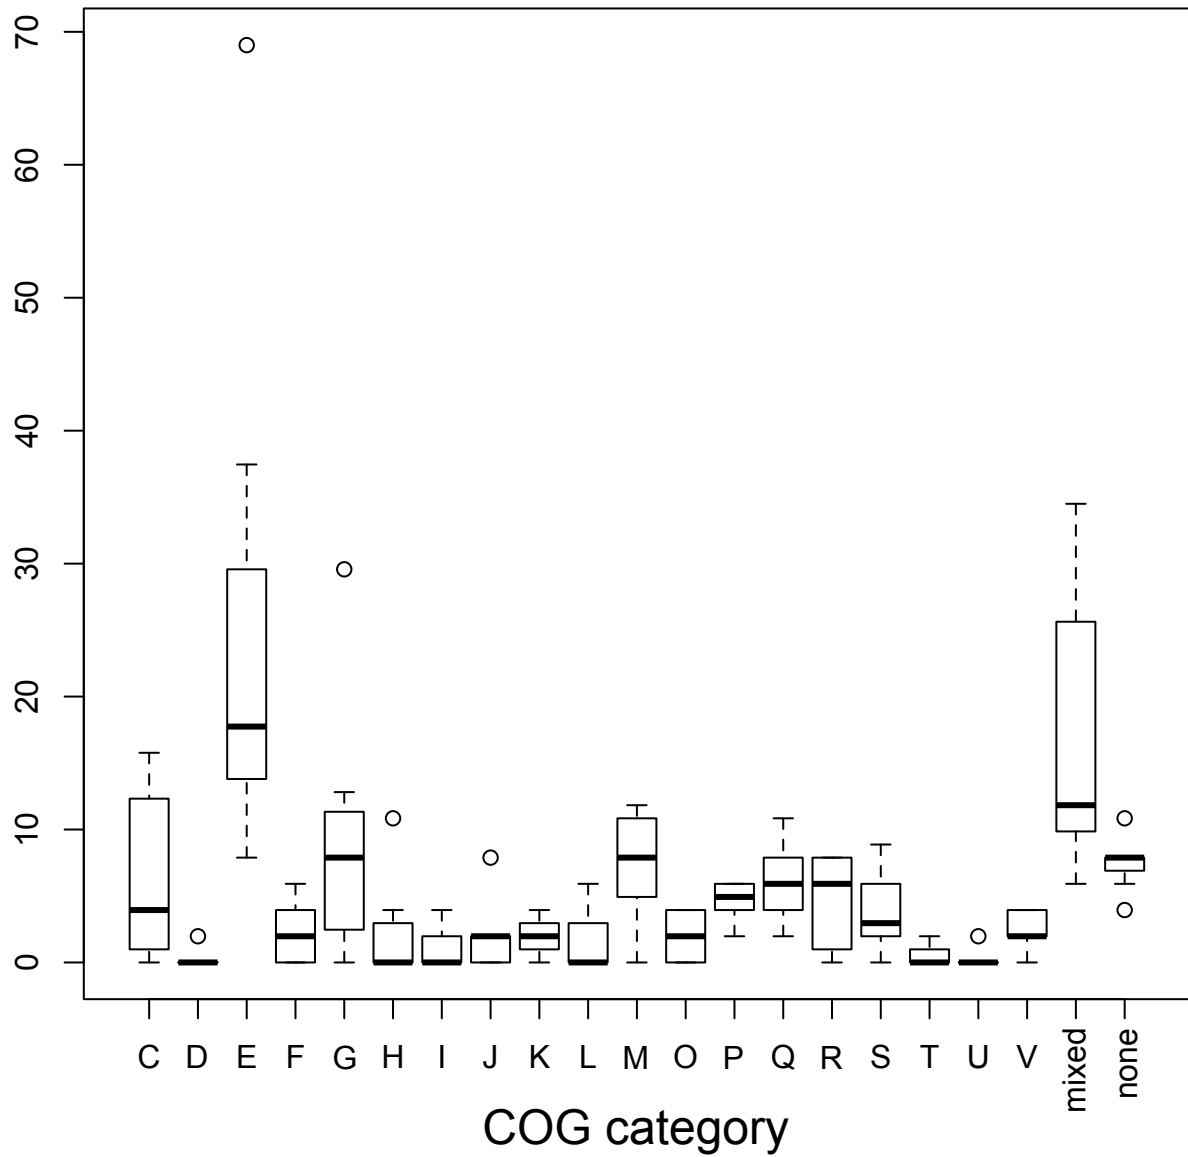

Supplement: mbo005121328sf03.pdf [file mbo005121328sf03.pdf]

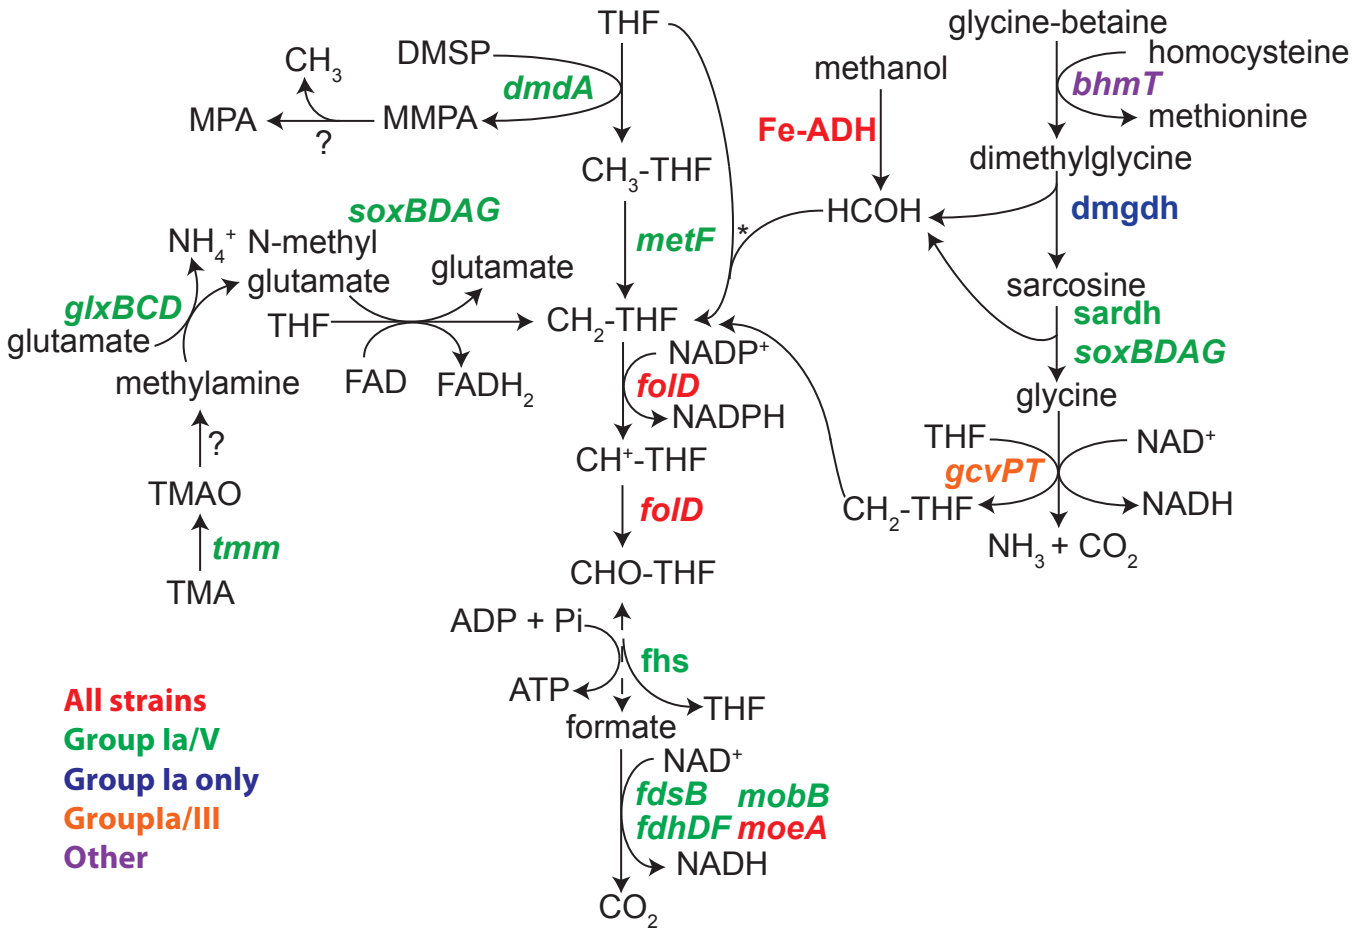

Supplement: mbo005121328sf04.pdf [file mbo005121328sf04.pdf]
